# Supplementary material for: Heat Stress, Physiological Response, and Heat-Related Symptoms among Thai Sugarcane Workers
Source: MDPI journal article supplement (doi:10.3390/ijerph17176363), 2020-09-01
Supplement: s1 [file s1]

## Heat-related symptoms among Thai sugarcane workers

Please put ✓ in answer box and fill in information about you.

1. Gender           ( ) male                                 ( ) female
2. Age ..... years
3. Highest education completed (education years)  
    ( ) no education (0 years)                                 ( ) primary school (6 years)  
    ( ) secondary school (9 years)                                 ( ) high school (12 years)  
    ( ) technical school (12 year)                                 ( ) higher technical school (14 years)  
    ( ) associates degree college (14 years)                                 ( ) bachelors degree (16 years)  
    ( ) more than bachelors degree (more than 16 years, specify.....years)  
    ( ) other, please specify.....
4. Marital status  
    ( ) single                                                         ( ) married  
    ( ) widowed                                                         ( ) divorced
5. Body weight ..... kilograms
6. Height ..... centimeters
7. Housing during the harvesting season  
    ( ) camp  
    ( ) house  
    ( ) apartment  
    ( ) other, please specify.....
8. Level of income sufficiency  
    ( ) sufficient with savings  
    ( ) sufficient without savings  
    ( ) not sufficient with debt  
    ( ) refused to answer
9. What is your job?  
    ( ) sugarcane worker  
    ( ) sugarcane factory worker (if choose this answer, please specify your task)  
        ( ) milling  
        ( ) boiling  
        ( ) crystallization  
        ( ) maintenance  
        ( ) other, please specify.....
10. How many years have you worked for your job? ..... years
11. Average work duration.....days per week, and .....hours per day
12. When did you start working? .....
13. How many total minutes of break do you get in the morning? .....
14. How many total minutes of break do you get in the afternoon? .....
15. When do you stop working?.....

1. Smoke  
☐ No (go to 2)      ☐ Yes (go to 1.1)      ☐ Used to smoke (go to 1.2 and 1.3)

1.1 ( ) if yes, cigarettes per day..... How long.....years

1.2 ( ) how long smoke till stop? .....yearss

1.3 how long ago did you stop? ..... years

2. Ever drink alcohol

( ) never (go to Section III) ( ) yes ( ) Used to drink

2.1 if yes, Duration of drinking .....years

2.2 if yes, frequency ( ) every day ( ) 2-3 times per week ( ) once a month ( ) occasionally

2.3 if used to drink how long drink till stop? .....years.

2.4. how long ago did you stop? .....years.

**Section III: Health symptoms**

In the past harvesting season (4 months), have you had any of these health problems?

Please put ✓ in the answer box.

| Symptom                    | Answer    |           |       |
|----------------------------|-----------|-----------|-------|
|                            | Regularly | Sometimes | Never |
| 1. Muscle cramps           |           |           |       |
| 2. Weakness/fatigue        |           |           |       |
| 3. Heavy sweating          |           |           |       |
| 4. Fainting                |           |           |       |
| 5. Dry mouth               |           |           |       |
| 6. Rashes on skin          |           |           |       |
| 7. Dry, cracking skin      |           |           |       |
| 8. Blisters on skin        |           |           |       |
| 9. Swelling hands/feet     |           |           |       |
| 10. Headache               |           |           |       |
| 11. Fever                  |           |           |       |
| 12. Dizziness              |           |           |       |
| 13. Nausea                 |           |           |       |
| 14. Dysuria                |           |           |       |
| 15. Vomiting               |           |           |       |
| 16. Itchy skin             |           |           |       |
| 17. Eye irritation         |           |           |       |
| 18. Nose congestion        |           |           |       |
| 19. Cough                  |           |           |       |
| 20. Chest tightness        |           |           |       |
| 21. Wheezing               |           |           |       |
| 22. Loss of appetite       |           |           |       |
| 23. Other abnormal symptom |           |           |       |
| Please specify.....        |           |           |       |

**Section IV: Fluid intake**

During the harvest season how much do you drink (ml per day)? (train interviewer to calculate based on answer, or could have coded pictures)

| Time                   | Normal<br>temp. water | Ice<br>water | Mineral<br>water | Carbonated<br>water | Sweet<br>water | Alcohol | Energy<br>drink |
|------------------------|-----------------------|--------------|------------------|---------------------|----------------|---------|-----------------|
| Breakfast              |                       |              |                  |                     |                |         |                 |
| Morning<br>work time   |                       |              |                  |                     |                |         |                 |
| Lunch                  |                       |              |                  |                     |                |         |                 |
| Afternoon<br>work time |                       |              |                  |                     |                |         |                 |
| Dinner<br>until bed    |                       |              |                  |                     |                |         |                 |
